# Supplementary material for: Genetic polymorphisms of lncRNA-p53 regulatory network genes are associated with concurrent chemoradiotherapy toxicities and efficacy in nasopharyngeal carcinoma patients
Source: PubMed Central journal article supplement (PMC5559481; doi:10.1038/s41598-017-08890-2), 2017-08-16
Supplement: 41598_2017_8890_MOESM1_ESM.pdf [file 41598_2017_8890_MOESM1_ESM.pdf]

**Genetic polymorphisms of lncRNA-p53 regulatory network genes are associated with the concurrent chemoradiotherapy toxicities and efficacy in nasopharyngeal carcinoma patients**

Youhong Wang<sup>1</sup>, Zhen Guo<sup>1</sup>, Yu Zhao<sup>2</sup>, Yi Jin<sup>2</sup>, Liang An<sup>1</sup>, Bin Wu<sup>1</sup>, Zhaoqian Liu<sup>1</sup>, Xiaoping Chen<sup>1</sup>, Xiang Chen<sup>3</sup>, Honghao Zhou<sup>1</sup>, Hui Wang<sup>2,\*</sup>, Wei Zhang<sup>1,\*</sup>

\* To whom correspondence should be addressed. Wei Zhang, Department of Clinical Pharmacology, Xiangya Hospital, Central South University, 110 Xiang Ya Road, Changsha, Hunan 410078, P.R. China. Email: [yjsd2003@163.com](mailto:yjsd2003@163.com).

**Supplementary Table S1** Associations Between Patient-Related, Tumor-Related, and Therapy-Related Characteristics and Concurrent Chemoradiotherapy-Induced Toxicity

| Parameter         | No. | Dermatitis         |                | Mucositis          |                | Leukopenia         |                | Neutropenia        |                | Anemia             |                | Thrombocytopenia   |                | Myelosuppression   |                |
|-------------------|-----|--------------------|----------------|--------------------|----------------|--------------------|----------------|--------------------|----------------|--------------------|----------------|--------------------|----------------|--------------------|----------------|
|                   |     | OR (95%CI)         | P <sup>a</sup> | OR (95%CI)         | P <sup>a</sup> | OR (95%CI)         | P <sup>a</sup> | OR (95%CI)         | P <sup>a</sup> | OR (95%CI)         | P <sup>a</sup> | OR (95%CI)         | P <sup>a</sup> | OR (95%CI)         | P <sup>a</sup> |
| Sex               |     |                    |                |                    |                |                    |                |                    |                |                    |                |                    |                |                    |                |
| Male              | 374 | 1.000              |                | 1.000              |                | 1.000              |                | 1.000              |                | 1.000              |                | 1.000              |                | 1.000              |                |
| Female            | 131 | 0.641(0.246-1.532) | 0.296          | 1.240(0.693-2.221) | 0.468          | 2.236(1.281-3.901) | <b>0.005</b>   | 1.830(1.078-3.109) | <b>0.025</b>   | 3.776(2.385-5.978) | <b>0.000</b>   | 0.708(0.366-1.369) | 0.304          | 1.808(1.115-2.931) | <b>0.016</b>   |
| Age, y            |     |                    |                |                    |                |                    |                |                    |                |                    |                |                    |                |                    |                |
| < 47              | 229 | 1.000              |                | 1.000              |                | 1.000              |                | 1.000              |                | 1.000              |                | 1.000              |                | 1.000              |                |
| ≥ 47              | 276 | 1.136(0.621-2.079) | 0.679          | 0.818(0.539-1.242) | 0.346          | 1.008(0.586-1.733) | 0.978          | 1.251(0.765-2.044) | 0.372          | 2.698(1.795-4.056) | <b>0.000</b>   | 2.370(1.456-3.857) | 0.001          | 1.190(0.762-1.859) | 0.445          |
| BMI               |     |                    |                |                    |                |                    |                |                    |                |                    |                |                    |                |                    |                |
| < 18.5            | 30  | 1.000              |                | 1.000              |                | 1.000              |                | 1.000              |                | 1.000              |                | 1.000              |                | 1.000              |                |
| 18.5 ~ 24         | 274 | 0.832(0.263-2.638) | 0.755          | 0.575(0.248-1.332) | 0.197          | 0.673(0.244-1.860) | 0.445          | 0.912(0.330-2.523) | 0.860          | 0.648(0.281-1.492) | 0.308          | 0.936(0.350-2.506) | 0.895          | 1.083(0.420-2.790) | 0.869          |
| ≥ 24              | 201 | 0.585(0.171-2.000) | 0.393          | 0.711(0.298-1.698) | 0.442          | 0.519(0.176-1.527) | 0.234          | 0.745(0.260-2.135) | 0.584          | 0.287(0.120-0.685) | <b>0.005</b>   | 0.706(0.251-1.990) | 0.510          | 0.903(0.338-2.408) | 0.838          |
| Smoking status    |     |                    |                |                    |                |                    |                |                    |                |                    |                |                    |                |                    |                |
| Nonsmoker         | 258 | 1.000              |                | 1.000              |                | 1.000              |                | 1.000              |                | 1.000              |                | 1.000              |                | 1.000              |                |
| Smoker            | 247 | 1.560(0.867-2.807) | 0.138          | 1.033(0.613-1.741) | 0.904          | 1.244(0.597-2.591) | 0.560          | 0.845(0.454-1.573) | 0.595          | 0.833(0.504-1.377) | 0.475          | 0.878(0.5-1.542)   | 0.650          | 0.765(0.437-1.342) | 0.351          |
| Drinking status   |     |                    |                |                    |                |                    |                |                    |                |                    |                |                    |                |                    |                |
| Nondrinker        | 415 | 1.000              |                | 1.000              |                | 1.000              |                | 1.000              |                | 1.000              |                | 1.000              |                | 1.000              |                |
| Drinker           | 90  | 0.547(0.228-1.313) | 0.177          | 1.106(0.625-1.956) | 0.730          | 0.959(0.431-2.135) | 0.918          | 0.763(0.369-1.580) | 0.467          | 1.385(0.802-2.394) | 0.243          | 0.894(0.476-1.678) | 0.727          | 1.080(0.578-2.019) | 0.810          |
| Histological type |     |                    |                |                    |                |                    |                |                    |                |                    |                |                    |                |                    |                |
| WHO type II       | 214 | 1.000              |                | 1.000              |                | 1.000              |                | 1.000              |                | 1.000              |                | 1.000              |                | 1.000              |                |
| WHO type III      | 291 | 1.111(0.607-2.032) | 0.734          | 0.789(0.521-1.197) | 0.265          | 1.559(0.901-2.700) | 0.113          | 1.419(0.856-2.351) | 0.174          | 1.065(0.711-1.595) | 0.761          | 1.000(0.627-1.596) | 1.000          | 1.444(0.924-2.258) | 0.107          |
| Clinical stage    |     |                    |                |                    |                |                    |                |                    |                |                    |                |                    |                |                    |                |
| I-II              | 50  | 1.000              |                | 1.000              |                | 1.000              |                | 1.000              |                | 1.000              |                | 1.000              |                | 1.000              |                |
| III-IV            | 455 | 1.175(2.247-5.588) | 0.839          | 2.212(0.424-3.464) | 0.719          | 8.363(1.658-42.18) | <b>0.010</b>   | 1.157(0.362-3.695) | 0.806          | 0.865(0.313-2.392) | 0.780          | 1.818(0.576-5.736) | 0.308          | 1.754(0.579-5.318) | 0.321          |

|             |     |                    |       |                    |              |                    |              |                     |       |                     |              |                    |              |                     |              |       |
|-------------|-----|--------------------|-------|--------------------|--------------|--------------------|--------------|---------------------|-------|---------------------|--------------|--------------------|--------------|---------------------|--------------|-------|
| T-staging   |     |                    |       |                    |              |                    |              |                     |       |                     |              |                    |              |                     |              |       |
| T1-T2       | 246 | 1.000              |       | 1.000              |              | 1.000              |              | 1.000               |       | 1.000               |              | 1.000              |              | 1.000               |              | 1.000 |
| T3-T4       | 259 | 1.112(0.583-2.120) | 0.747 | 1.210(0.769-1.903) | 0.410        | 1.189(0.663-2.132) | 0.562        | 1.516(0.927-2.478)  | 0.097 | 1.434(0.960-2.142)  | 0.078        | 1.070(0.640-1.787) | 0.797        | 1.599(1.025-2.494)  | <b>0.039</b> |       |
| N-staging   |     |                    |       |                    |              |                    |              |                     |       |                     |              |                    |              |                     |              |       |
| N0-N1       | 93  | 1.000              |       | 1.000              |              | 1.000              |              | 1.000               |       | 1.000               |              | 1.000              |              | 1.000               |              | 1.000 |
| N2-N3       | 412 | 1.222(0.404-3.693) | 0.723 | 0.843(0.402-1.771) | 0.653        | 0.452(0.202-1.011) | 0.053        | 0.683(0.304-1.534)  | 0.356 | 1.493(0.719-3.098)  | 0.282        | 0.641(0.297-1.382) | 0.256        | 0.695(0.328-1.471)  | 0.341        |       |
| IC regimen  |     |                    |       |                    |              |                    |              |                     |       |                     |              |                    |              |                     |              |       |
| DP          | 200 | 1.000              |       | 1.000              |              | 1.000              |              | 1.000               |       | 1.000               |              | 1.000              |              | 1.000               |              | 1.000 |
| FP          | 92  | 1.070(0.262-4.364) | 0.925 | 0.301(0.094-0.960) | <b>0.042</b> | 5.138(1.121-23.54) | <b>0.035</b> | 0.368(0.074-1.832)  | 0.222 | 0.863(0.306-2.432)  | 0.780        | 3.636(1.125-11.82) | <b>0.031</b> | 1.429(0.412-4.951)  | 0.574        |       |
| TP          | 203 | 0.869(0.330-2.292) | 0.777 | 0.356(0.185-0.687) | <b>0.002</b> | 2.097(0.825-5.330) | 0.120        | 1.722(0.784-3.783)  | 0.176 | 1.198(0.643-2.235)  | 0.569        | 0.741(0.368-1.495) | 0.403        | 1.993(0.993-4.000)  | 0.052        |       |
| GP          | 10  | 0.000              | 0.999 | 0.314(0.083-2.226) | 0.430        | 13.947(2.51-77.28) | <b>0.003</b> | 4.156(0.970-17.805) | 0.055 | 3.109(0.657-14.716) | 0.153        | 6.566(1.611-26.77) | <b>0.009</b> | 6.672(1.600-27.813) | <b>0.009</b> |       |
| CRT regimen |     |                    |       |                    |              |                    |              |                     |       |                     |              |                    |              |                     |              |       |
| FP          | 85  | 1.000              |       | 1.000              |              | 1.000              |              | 1.000               |       | 1.000               |              | 1.000              |              | 1.000               |              | 1.000 |
| TP          | 108 | 0.954(0.217-4.186) | 0.950 | 1.521(0.453-5.102) | 0.497        | 4.936(1.062-22.95) | <b>0.042</b> | 1.580(0.361-6.922)  | 0.544 | 3.829(1.978-7.411)  | <b>0.000</b> | 4.438(1.185-16.62) | <b>0.027</b> | 3.125(0.898-10.866) | 0.073        |       |
| DDP         | 83  | 1.050(0.284-3.887) | 0.942 | 0.696(0.225-2.154) | 0.529        | 0.844(0.198-3.590) | 0.818        | 0.683(0.156-2.979)  | 0.612 | 3.182(1.601-6.326)  | <b>0.001</b> | 2.273(0.730-7.074) | 0.156        | 1.079(0.327-3.559)  | 0.901        |       |
| NDP         | 172 | 0.479(0.113-2.042) | 0.320 | 0.573(0.176-1.862) | 0.355        | 2.340(0.514-10.65) | 0.272        | 0.538(0.121-2.401)  | 0.417 | 0.966(0.523-1.786)  | 0.913        | 4.089(1.171-14.28) | <b>0.027</b> | 1.074(0.309-3.737)  | 0.911        |       |
| DP          | 57  | 0.607(0.112-3.285) | 0.563 | 0.293(0.077-1.113) | 0.071        | 5.888(1.064-32.58) | <b>0.042</b> | 1.295(0.255-6.588)  | 0.756 | 2.315(1.083-4.948)  | <b>0.030</b> | 1.110(0.236-5.230) | 0.895        | 2.607(0.648-10.490) | 0.177        |       |
| pGTVnx      |     |                    |       |                    |              |                    |              |                     |       |                     |              |                    |              |                     |              |       |
| <71.00Gy    | 261 | 1.000              |       | 1.000              |              | 1.000              |              | 1.000               |       | 1.000               |              | 1.000              |              | 1.000               |              | 1.000 |
| ≥71.00Gy    | 234 | 0.710(0.364-1.388) | 0.317 | 1.034(0.641-1.669) | 0.891        | 0.713(0.392-1.297) | 0.268        | 1.489(0.877-2.528)  | 0.141 | 1.170(0.745-1.837)  | 0.496        | 0.752(0.439-1.290) | 0.301        | 1.096(0.670-1.791)  | 0.716        |       |

Abbreviations: CI, confidence interval; OR, odds ratio; BMI, Body Mass Index; IC regimen, Induction chemotherapy regimens; CRT regimen, concurrent chemoradiotherapy regimen; pGTVnx, irradiation dose.

P<sub>a</sub> values were calculated with adjustment for age, sex, BMI, smoking status, drinking status, histological type, clinical stage, T-staging, N-staging, Induction chemotherapy regimens, concurrent chemoradiotherapy regimen, irradiation dose.

P<0.05 were shown in bold.

**Supplementary Table S2** The associations between clinical factors and efficacy of 3 months after treatment on primary tumor and lymph node

| Parameter  | No. | Primary tumor 3 months after treatment |              | Lymph node 3 months after treatment |              |
|------------|-----|----------------------------------------|--------------|-------------------------------------|--------------|
|            |     | OR (95%CI)                             | <i>P</i>     | OR (95%CI)                          | <i>P</i>     |
| T-staging  |     |                                        |              |                                     |              |
| T1-T2      | 246 | 1.00 (reference)                       |              | 1.00 (reference)                    |              |
| T3-T4      | 259 | 0.351 (0.140-0.882)                    | <b>0.026</b> | 0.557 (0.297-1.045)                 | 0.068        |
| IC regimen |     |                                        |              |                                     |              |
| DP         | 200 | 1.00 (reference)                       |              | 1.00 (reference)                    |              |
| GP         | 10  | 0.146 (0.025-0.871)                    | <b>0.035</b> | 1.064 (0.184-6.148)                 | 0.994        |
| TP         | 203 | 1.424 (0.498-4.073)                    | 0.510        | 5.423 (1.997-14.727)                | <b>0.001</b> |

Abbreviations: CI, confidence interval; OR, odds ratio; IC regimen, Induction chemotherapy regimens;

*P*<0.05 were shown in bold.

**Supplementary Table S3** SNP causes miRNA : lncRNA Gain or Loss

| Gene      | SNP        | miRNA ID     | SNP causes miRNA : lncRNA Gain/Loss                                                                        | Literature                                                                                                                                    |
|-----------|------------|--------------|------------------------------------------------------------------------------------------------------------|-----------------------------------------------------------------------------------------------------------------------------------------------|
| MEG3      | rs10132552 | hsa-miR-564  | miRNA: 3' cgGAC-GACUGUGGCACGGa 5'<br>:     :       <br>lncRNA: 5' ccTTGACCAGCCCCGTGCct 3'                  | MiR-564 inhibits proliferation and invasion in breast cancer <sup>1</sup> , lung cancer <sup>2</sup> , glioblastoma cells <sup>3</sup> .      |
|           |            | hsa-miR-650  | miRNA: 3' caGGACU-CUCGCG--ACGGAGGa 5'<br> :                <br>lncRNA: 5' ccCTTGACCAGCCCCGTGCCTCct 3'      | Higher expression of miR-650 is associated with a favorable CLL prognosis and influences the proliferation capacity of B cells <sup>4</sup> . |
| TUSC7     | rs1829346  | hsa-miR-602  | miRNA: 3' ccCGGCGUCGACAG--C-GGGCACAg 5'<br>  :   :            X<br>lncRNA: 5' ggGGTGCCTTGACCAGCCCCGTGTc 3' | MiR-602 plays a pro-carcinogenic role in HBV-related hepatocarcinogenesis <sup>5</sup> .                                                      |
|           |            | hsa-miR-1304 | miRNA: 3' ccccAAGCUCCGAUGUCACUCu 5'<br>            <br>lncRNA: 5' caaaTTCGA----ACAGTGAGc 3'                | MiR-1304 suppresses human non-small cell lung cancer cell growth <sup>6</sup> .                                                               |
| LINC-PINT | rs1059698  | hsa-miR-646  | miRNA: 3' cgGAGUCU-CCGUCGACGAa 5'<br>     :        <br>lncRNA: 5' agCTAAGGTGAAAGCTGCTa 3'                  | MiR-646 correlated with tumor metastasis in clear cell renal carcinoma <sup>7</sup> .                                                         |

## References

1. Mutlu, M. *et al.* miR-564 acts as a dual inhibitor of PI3K and MAPK signaling networks and inhibits proliferation and invasion in breast cancer. *Sci Rep* **6**, 32541 (2016).
2. Yang, B. *et al.* MiR-564 functions as a tumor suppressor in human lung cancer by targeting ZIC3. *Biochem Biophys Res Commun* **467**, 690-696 (2015).
3. Jiang, C. *et al.* MicroRNA-564 is downregulated in glioblastoma and inhibited proliferation and invasion of glioblastoma cells by targeting TGF- $\beta$ 1. *Oncotarget* **7**,56200-56208 (2016).
4. Mraz, M. *et al.* MicroRNA-650 expression is influenced by immunoglobulin gene rearrangement and affects the biology of chronic lymphocytic leukemia. *Blood* **119**, 2110-2113 (2012).
5. Yang, L. *et al.* MicroRNA-602 regulating tumor suppressive gene RASSF1A is overexpressed in hepatitis B virus-infected liver and hepatocellular carcinoma. *Cancer Biol Ther* **9**, 803-808 (2010).
6. Li, C. G. *et al.* MicroRNA-1304 suppresses human non-small cell lung cancer cell growth in vitro by targeting heme oxygenase-1. *Acta Pharmacol Sin* **38**, 110-119 (2017).
7. Li, W. *et al.* Downregulated miR-646 in clear cell renal carcinoma correlated with tumour metastasis by targeting the nin one binding protein (NOB1). *Br J Cancer* **111**, 1188-1200 (2014).
